# Supplementary material for: Flaky nano-crystalline SnSe2 thin films for photoelectrochemical current generation
Source: Royal Society of Chemistry journal article supplement (doi:10.1039/c8ra04639e), 2018-01-01
Supplement: c8ra04639e1.pdf [file c8ra04639e1.pdf]

Electronic Supplementary Information

# Flaky Nano-Crystalline SnSe<sub>2</sub> Thin Films for Photoelectrochemical Current Generation

*Xiuyuan Shao,<sup>†\*</sup> Shisheng Li,<sup>†\*</sup> and Dai-Ming Tang*

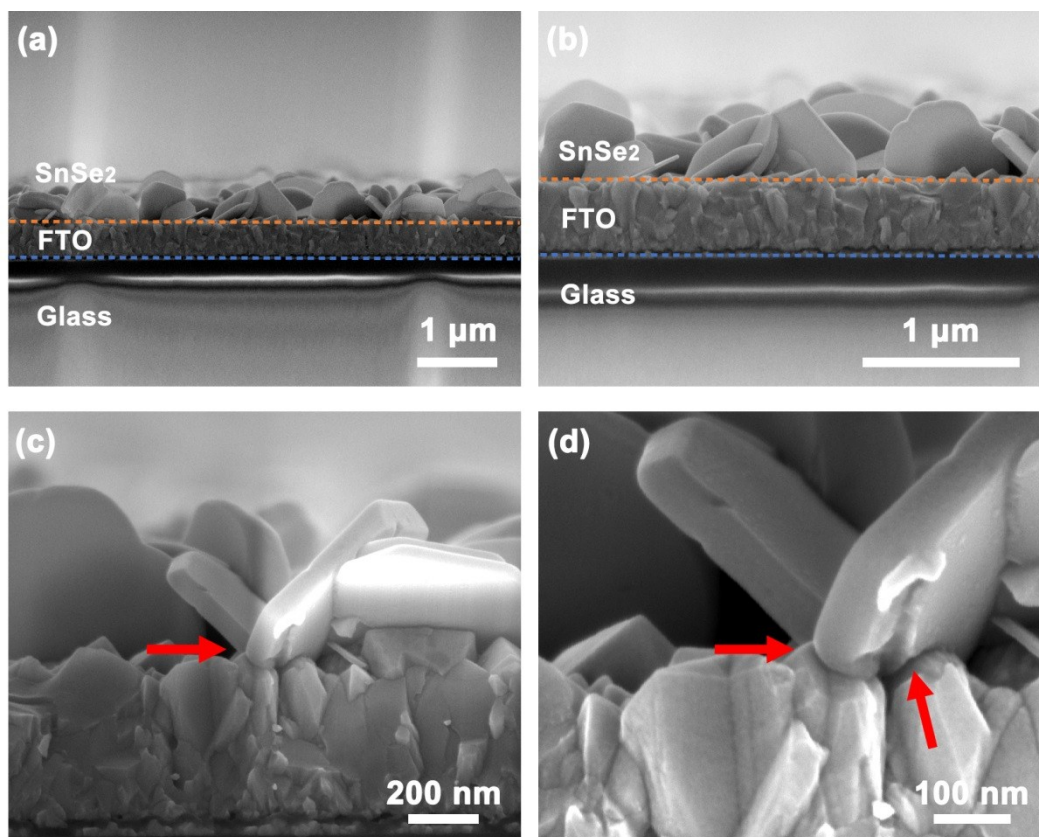

**Figure S1.** (a-d) SEM images of the cross section of SnSe<sub>2</sub> nanoflakes grown on FTO glass. (c, d) High-magnification SEM images showing the tilted SnSe<sub>2</sub> flakes and their connection with FTO glass.

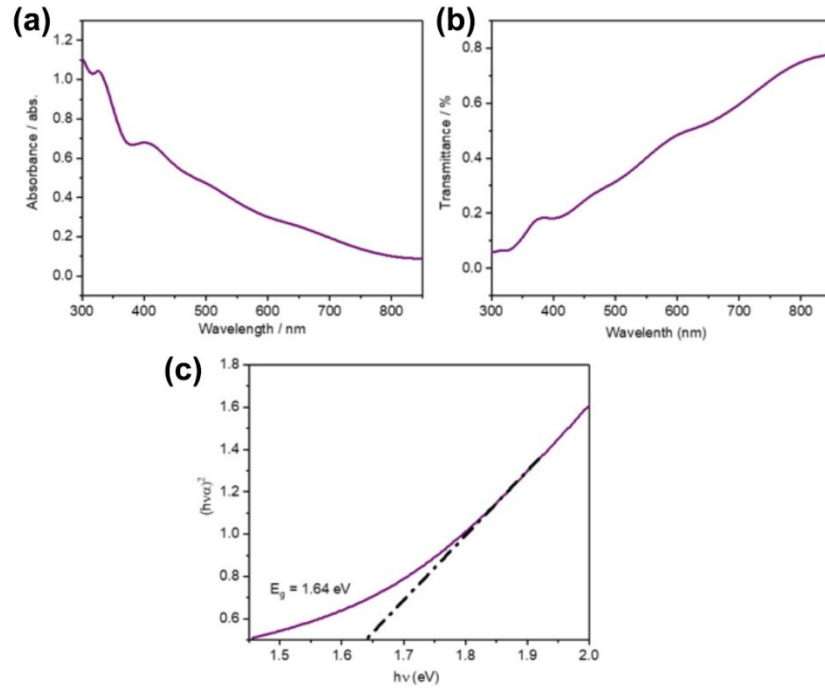

**Figure S2.** (a) UV-vis absorbance, (b) transmittance spectrum and (c) Tauc plot of flaky SnSe<sub>2</sub> on FTO substrate.

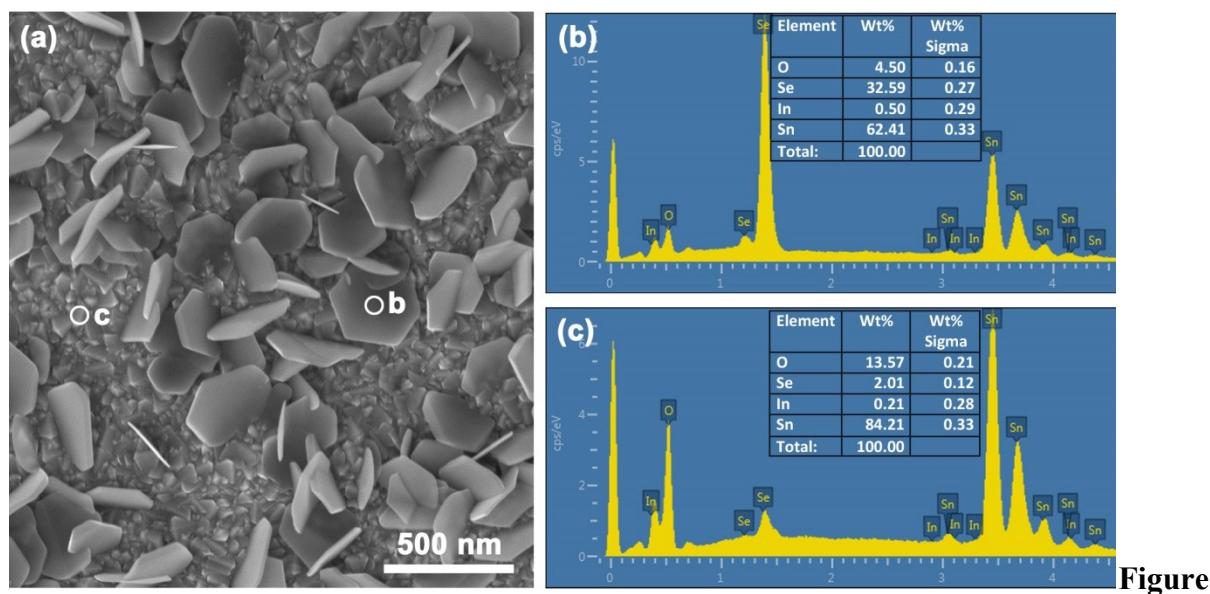

**S3.** (a) A SEM image of as-grown SnSe<sub>2</sub> nanoflakes on FTO glass. (b, c) EDX spectra of a SnSe<sub>2</sub> flake and the FTO substrate.

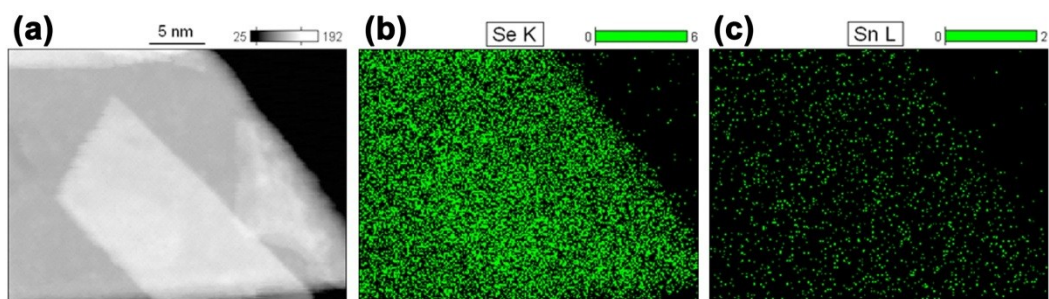

**Figure S4.** (a) Dark field TEM image of two stacked SnSe<sub>2</sub> nanoflakes. (b, c) Corresponding EDX maps of (b) Se and (c) Sn.

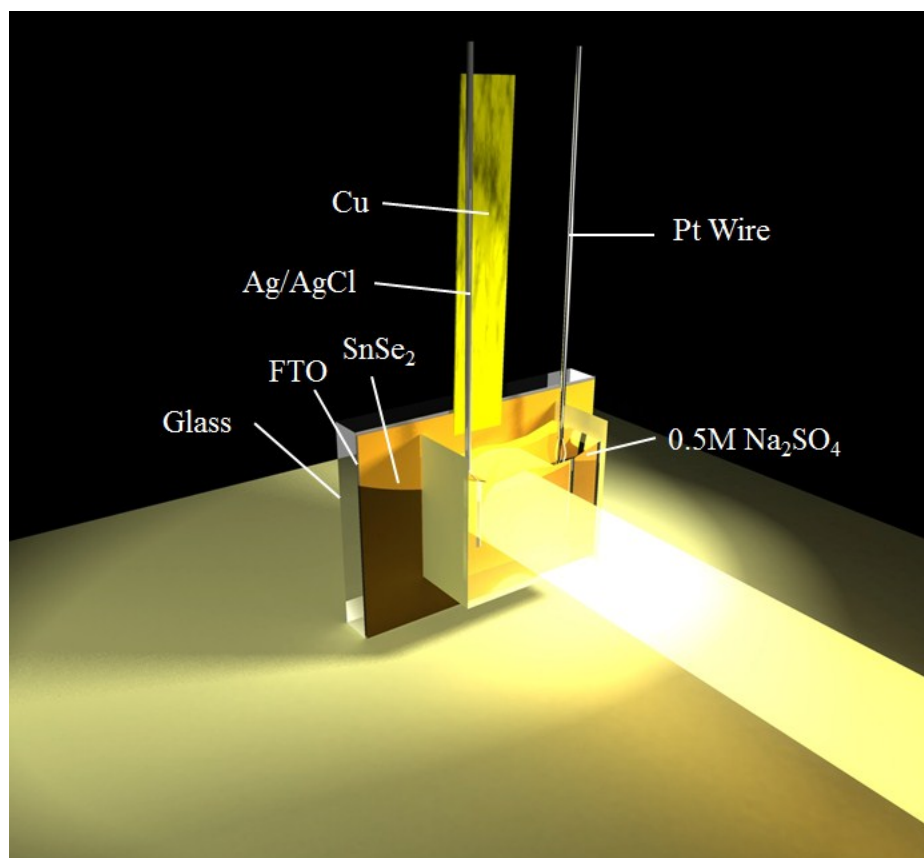

**Figure S5.** Schematic illustration of a PEC with SnSe<sub>2</sub>/FTO electrode, Pt mesh and Ag/AgCl as working electrode, counter electrode and reference electrode, respectively.

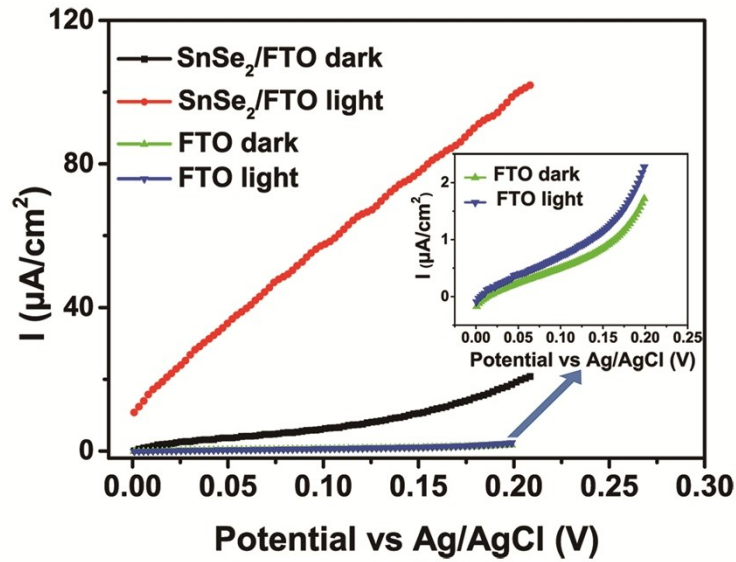

**Figure S6.** Linear voltammograms of SnSe<sub>2</sub>/FTO and bare FTO in the dark and under illumination, excludes the photocurrent contribution from FTO.

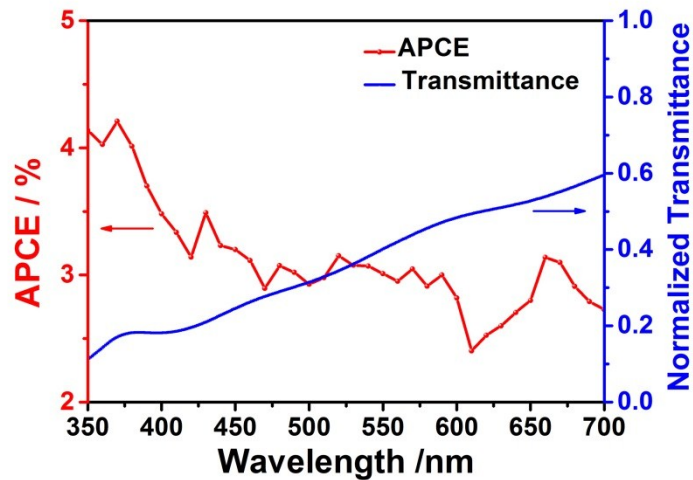

**Figure S7.** Plot of APCE spectra (red line) and transmittance spectra (blue line) versus wavelength at the potential of 0 V vs. Ag/AgCl electrode.

Dividing the IPCE by light harvesting efficiency, we can get the APCE efficiency (absorbed photon-to-current efficiencies), which is the internal efficiency value of the sample.

$$APCE = \frac{IPCE}{(1 - T(\%))}$$

Where T(%) is the transmittance. Here we ignore the effect of reflectance, since it is ignorable when compared with the absorbance.
